# Supplementary material
Source: Springer Nature journal article supplement (https://www.springermedizin.de/resource/supplementary/12967_2011_799_MOESM3_ESM.pdf/9577054)
Supplement: MOESM3 [file 9577054]

**Inclusion criteria**

Patients >18 years of age undergoing allogeneic liver transplantation from a cadaveric donor

Absence of any familial, sociological or geographical condition potentially hampering compliance with the study protocol and follow-up schedule

Written informed consent prior to any study procedures

**Exclusion criteria**

Known allergies to bovine or porcine products

Patients older than 65 years of age

Patients listed in a high-urgency status that would not allow proper preparation of the study interventions

Patients receiving a secondary liver graft (retransplantation)

Double organ transplant recipients

Pre-existing renal failure that requires or has required hemodialysis within the last year

Pulmonary function: FEV1, FVC, DLCO  $\leq$ 50% predicted

Cardiac function: left ventricular ejection fraction  $\leq$ 50%

HIV seropositive, HTLV seropositive, varicella virus active infection, or syphilis active infection.

History of any malignancy (including lymphoproliferative disease and hepatocellular carcinoma) except for squamous or basal cell carcinoma of the skin that has been treated with no evidence of recurrence

Unstable myocardium (evolving myocardial infarction), cardiogenic shock

Females capable of childbearing (hormonal status and gynecological consultation required)

Males not agreeing to use contraception for the duration of the study

Patient is pregnant, has a positive serum  $\beta$ -hCG, or is lactating

Known current substance abuse (drug or alcohol)

Prisoner

Use of an investigational agent within 30 days prior enrolment

Concurrent enrolment in any other clinical trial

Any psychiatric, addictive or other disorder that compromises ability to give informed consent
